# Supplementary material for: Targeting of miR-96-5p by catalpol ameliorates oxidative stress and hepatic steatosis in LDLr-/- mice via p66shc/cytochrome C cascade
Source: Aging (Albany NY). 2020 Feb 5;12(3):2049–69. doi: 10.18632/aging.102721 (PMC7041734; doi:10.18632/aging.102721)
Supplement: Supplementary Figures [file aging-12-102721-s001..pdf]

## SUPPLEMENTARY FIGURES

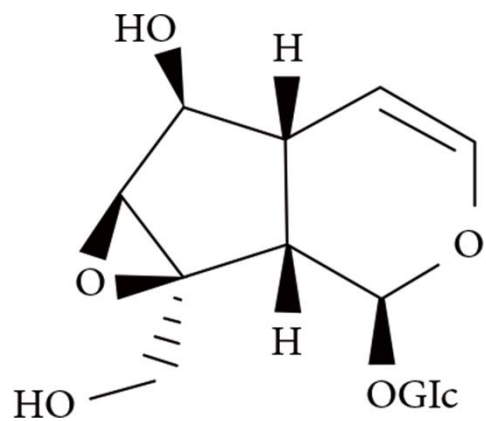

Supplementary Figure 1. Chemical structure of catalpol.

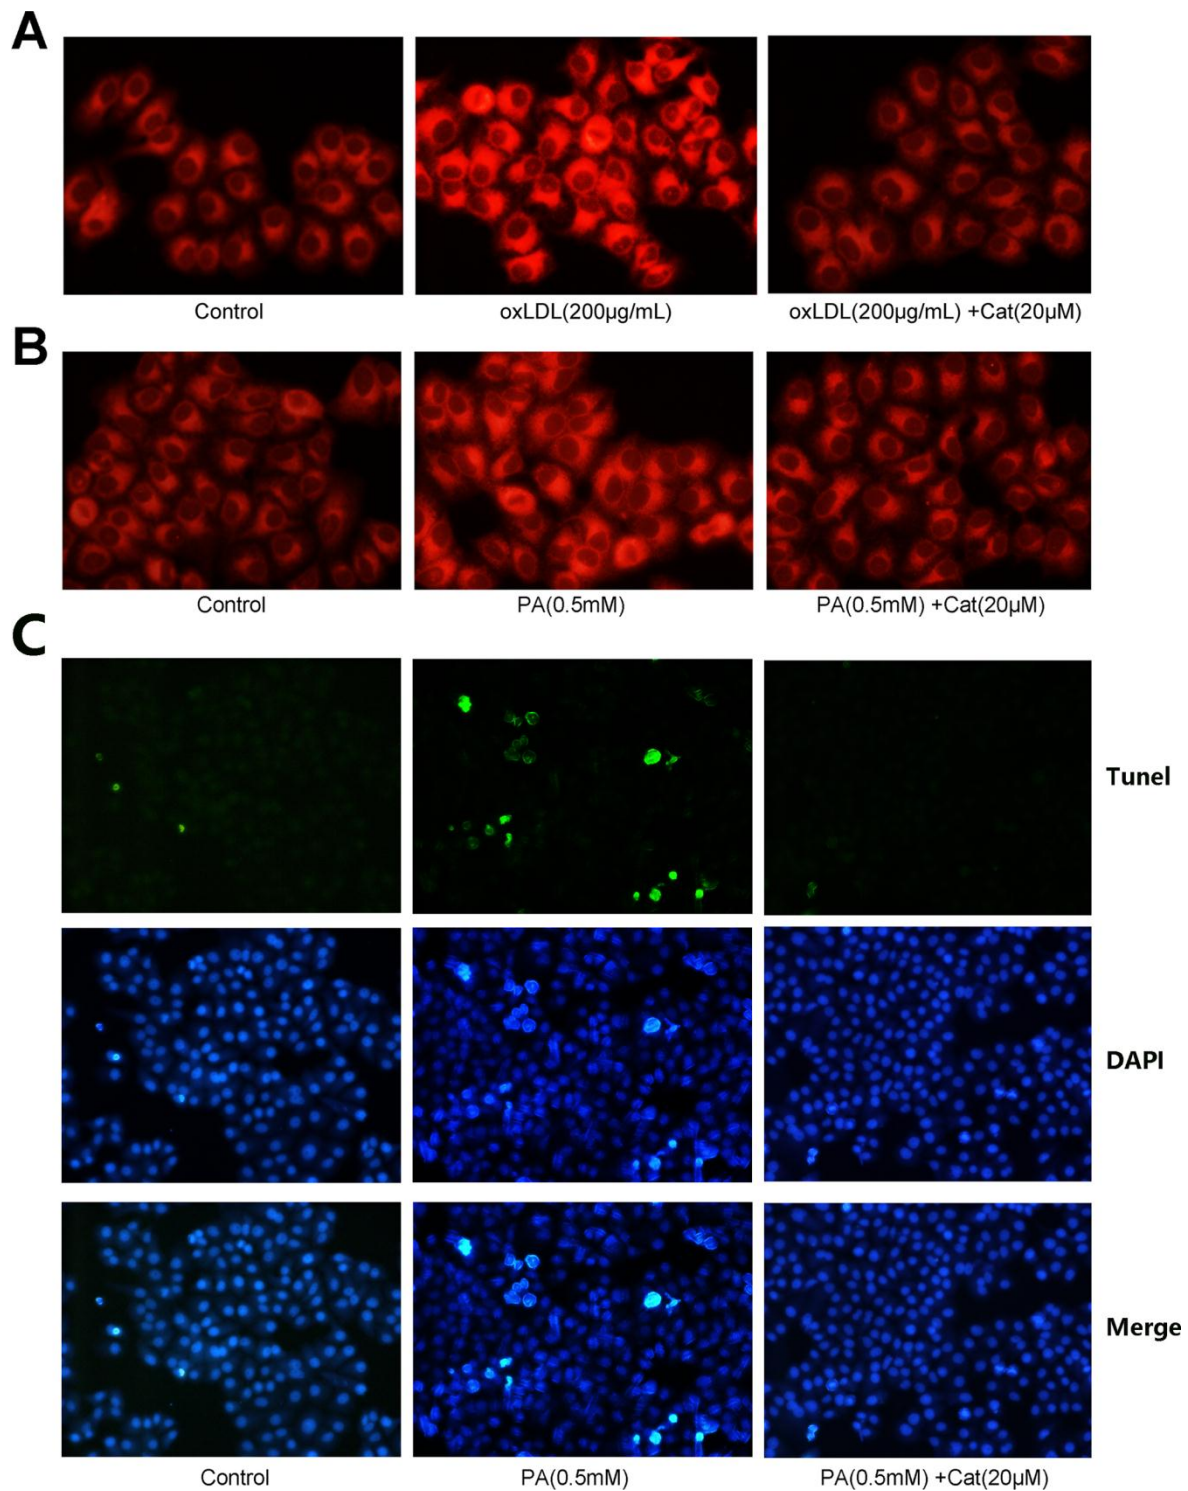

**Supplementary Figure 2. Catalpol inhibited hepatic steatosis and cell apoptosis in hepG2 cells.** (A) Catalpol inhibited hepatic steatosis in oxLDL-treated hepG2 cells. (B) Catalpol inhibited hepatic steatosis in PA-treated hepG2 cells. (C) Catalpol inhibited apoptosis in PA-treated hepG2 cells.

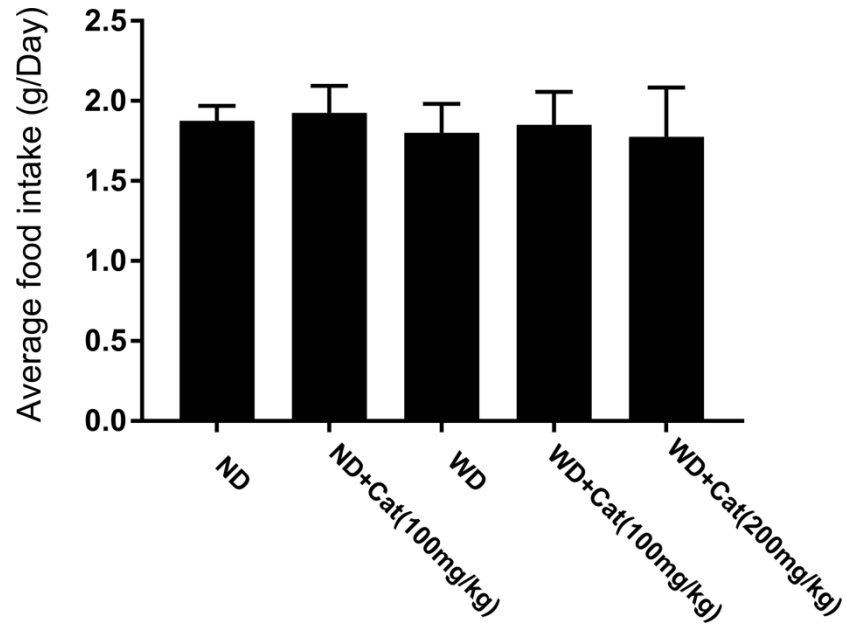

**Supplementary Figure 3. Food intake of the mice.** The results are the mean  $\pm$  SD (n=8).

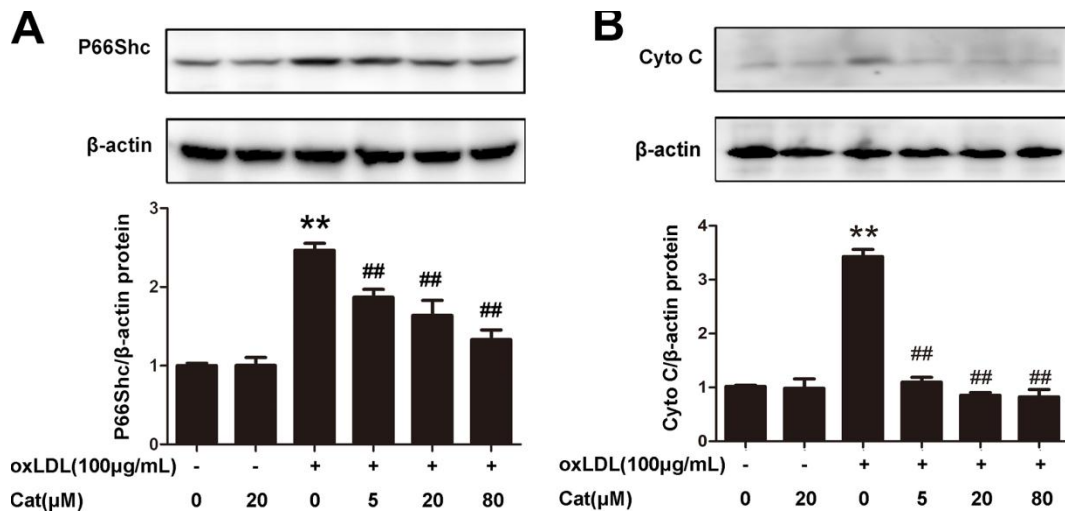

**Supplementary Figure 4. P66shc and cyto C protein expressions in oxLDL-treated hepG2 cells.** (A) P66shc protein expression. (B) cyto C protein expression. The results are the mean  $\pm$  SD (n=8), \*\*P < 0.05 vs. Control group, ##P < 0.05 vs. oxLDL group.

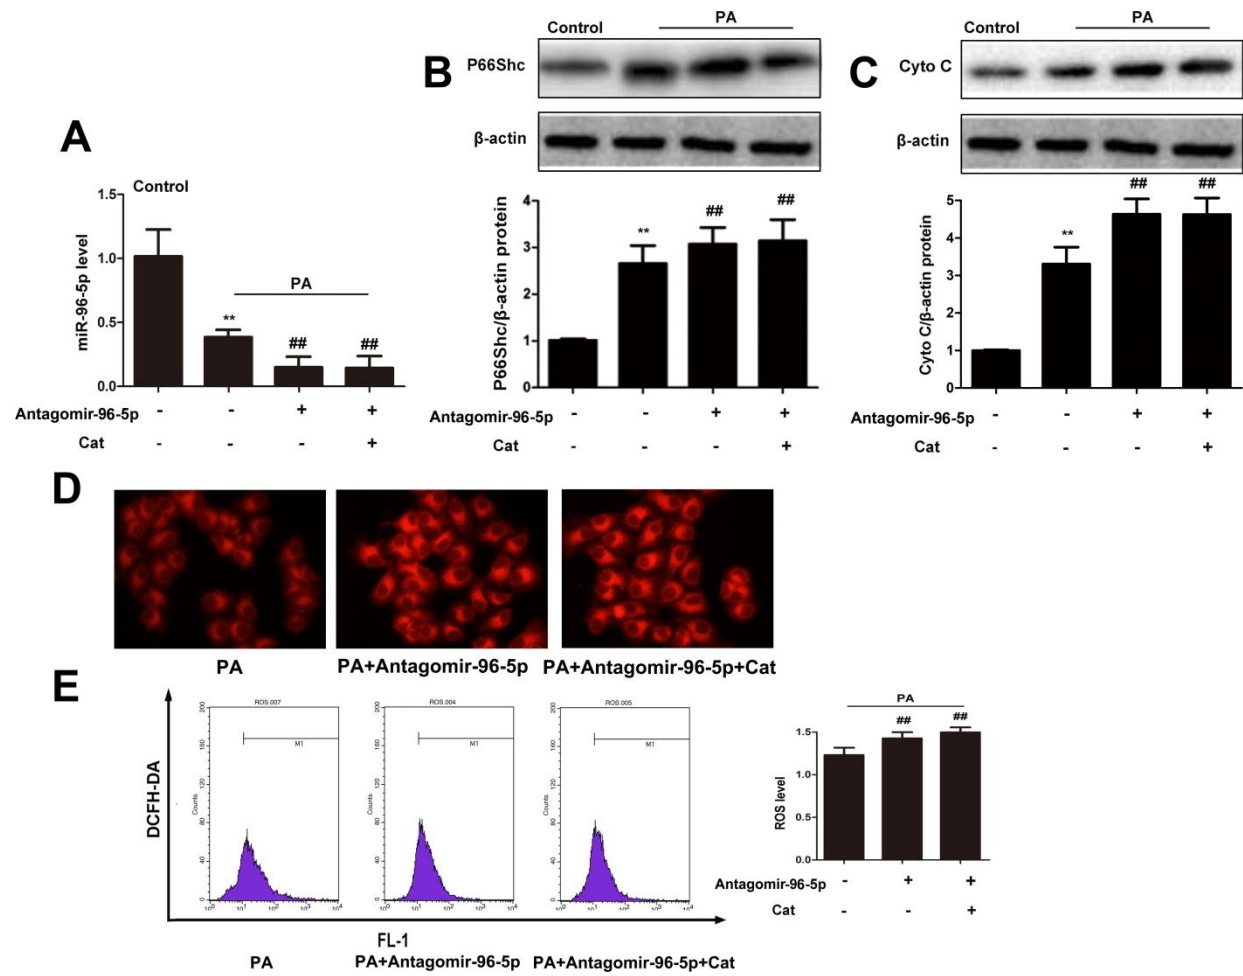

**Supplementary Figure 5. Antagomir-96-5p aggregated PA-induced hepatic steatosis and oxidative stress. (A)** miR-96-5p level. **(B)** P66Shc protein expression. **(C)** Cyto C protein expression. **(D)** Nile red staining. **(E)** ROS level. The results are the mean  $\pm$  SD (n=8), \*\*P < 0.05 vs. Control group, ##P < 0.05 vs. PA group.
